# Supplementary material
Source: PubMed Central journal article supplement (PMC2768525)
Supplement: NIHMS97955-supplement-3.pdf [file NIHMS97955-supplement-3.pdf]

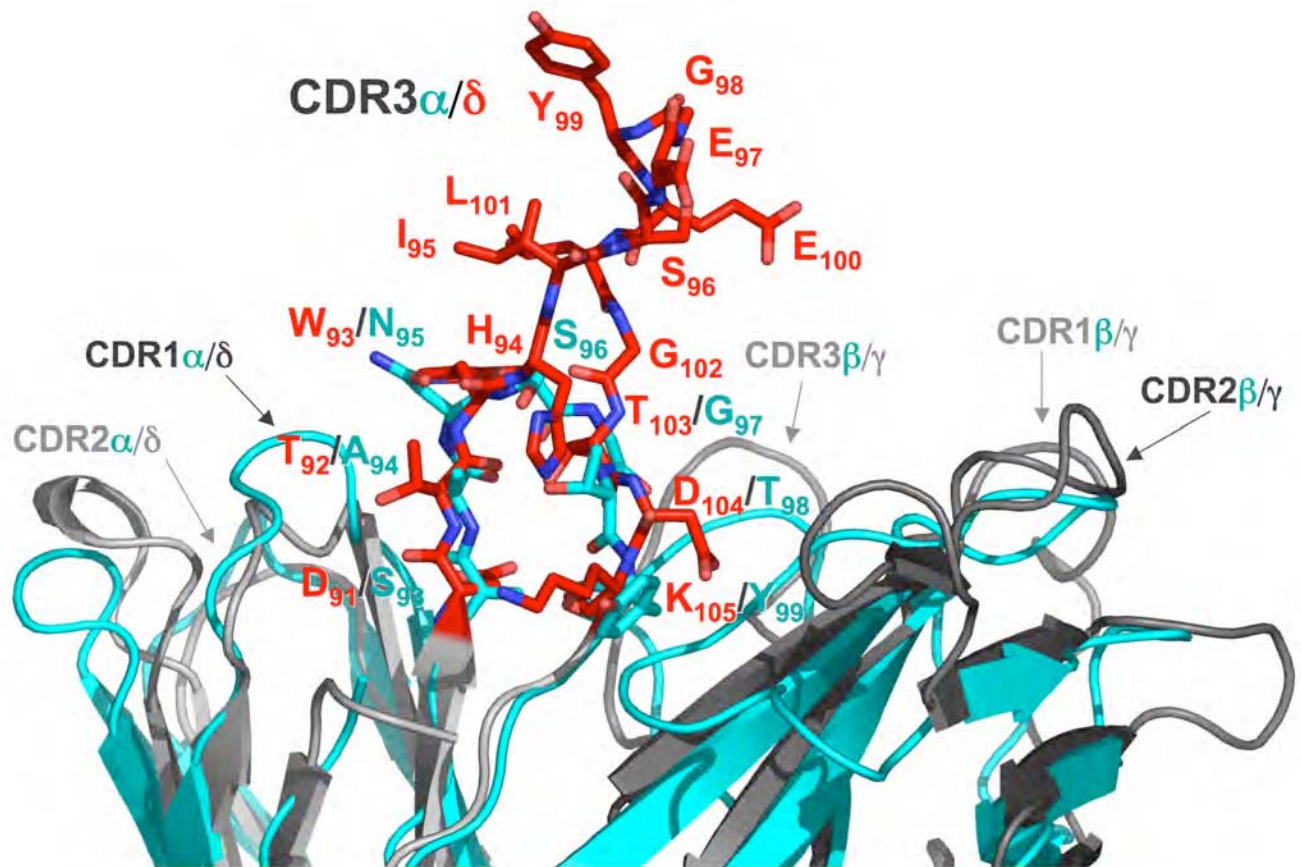

Supplementary Figure 1

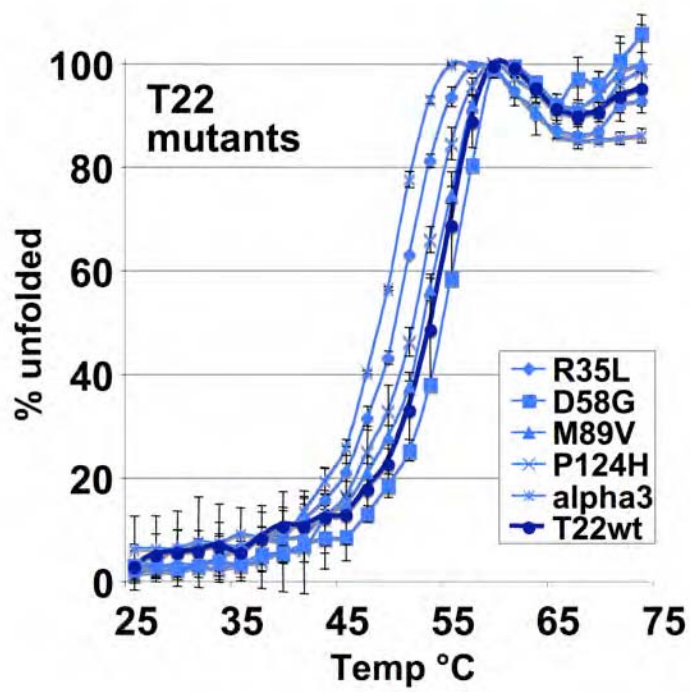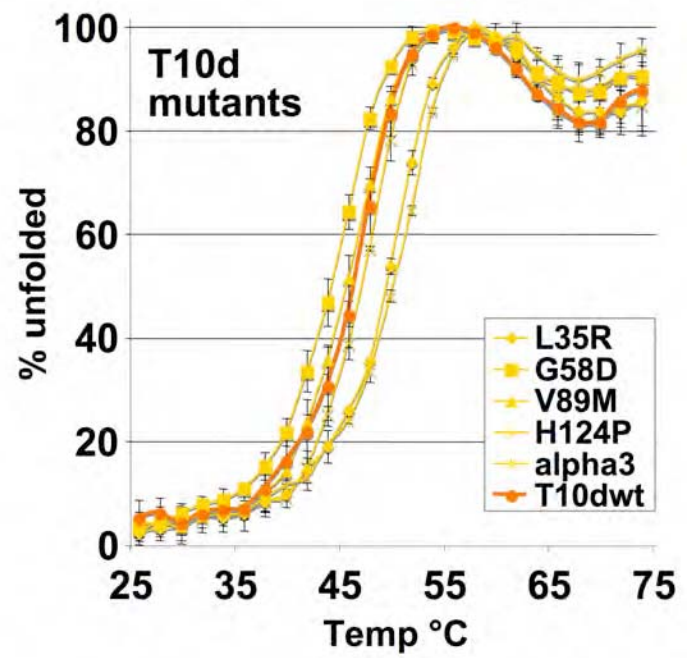

Supplementary Figure 2

## Supplementary Figure Legends

**Supplementary Figure 1.** The graft junctions of the G8 CDR3 $\delta$  and 172.10 CDR3 $\alpha$  are structurally compatible. Superposition of the variable domains of the G8  $\gamma\delta$  TCR (grey) and the 172  $\alpha\beta$  TCR (cyan). The overall RMSD of the variable domains of these TCRs is  $\sim 1.6\text{\AA}$ . The amino acid side chains of the CDR3 $\alpha$  and CDR3 $\delta$  loops are shown as sticks and labeled with their position and single letter amino-acid designation.

**Supplementary Figure 2.** Melting curves of the T22 and T10d wildtype and mutants. Left panel shows melting curves of T22 wildtype (dark blue) alongside the single position and  $\alpha 3$  domain mutants (light blue). Right panel shows melting curves of T10d wildtype (orange) alongside the single position and  $\alpha 3$  domain mutants (yellow). Error bars represent one standard deviation from the mean of two independent measurements.
